# Supplementary material for: Aep3p-dependent translation of yeast mitochondrial ATP8
Source: PubMed Central journal article supplement — Mol Biol Cell. 2017 Jun 1;28(11):1426–34. doi: 10.1091/mbc.E16-11-0775 (PMC5449143; doi:10.1091/mbc.e16-11-0775), 2017-06-01
Supplement: supp_E16-11-0775v1_E16-11-0775supplementalmaterial.pdf [file supp_E16-11-0775v1_E16-11-0775supplementalmaterial.pdf]

# Supplemental Materials

*Molecular Biology of the Cell*

Barros and Tzagoloff

**SUPPLEMENTAL MATERIAL**

Table S1. Properties of different *aep3* mutants

| Genotype                                                           | Mutation                            | Phenotype      |                                                                                                         | Ref                |
|--------------------------------------------------------------------|-------------------------------------|----------------|---------------------------------------------------------------------------------------------------------|--------------------|
|                                                                    |                                     | % $\rho^{-/0}$ | Mito. Translation                                                                                       |                    |
| <i>aep3</i>                                                        | $\Delta 336-661$                    | ~90            | Atp8p and Atp6p more affected than other mit. gene products                                             | Ellis et al., 2004 |
| $\Delta aep3$ <i>nATP8</i> <sup>GPD</sup>                          | $\Delta 336-661$                    | ~90            | Atp6p and other mitochondrial gene products very low because of high percentage of $\rho^{-/0}$ mutants | This study         |
| $\Delta aep3$ <i>sup</i> <sup>+</sup> <i>nATP8</i> <sup>GPD</sup>  | $\Delta 336-661$                    | ~20            | Normal except Atp8p is expressed from allotropic <i>nATP8</i>                                           | This study         |
| $\Delta aep3$ <i>nATP8</i> <sup>GPD-CYC1</sup>                     | $\Delta 336-661$                    | ND             | Normal except Atp8p is expressed from allotropic <i>nATP8</i>                                           | This study         |
| <i>aep3-6b</i>                                                     | A379E                               | ~90            | Severely depressed                                                                                      | This study         |
| <i>aep3-6b</i> <i>sup</i> <sup>+</sup> <i>nATP8</i> <sup>GPD</sup> | A379E                               | ~10            | Normal except Atp8p is expressed from allotropic <i>nATP8</i>                                           | This study         |
| <i>aep3-1s</i>                                                     | $\Delta 416-606$                    | ~90            | Severely depressed                                                                                      | This study         |
| <i>aep3-1s</i> <i>sup</i> <sup>+</sup> <i>nATP8</i> <sup>GPD</sup> | $\Delta 416-606$                    | ~10            | Normal except Atp8p is expressed from allotropic <i>nATP8</i>                                           | This study         |
| <i>aep3-1c</i>                                                     | A379E,<br>N331E<br>$\Delta 416-606$ | ~90            | Severely depressed                                                                                      | This study         |
| <i>aep3-1c</i> <i>sup</i> <sup>+</sup> <i>nATP8</i> <sup>GPD</sup> | A379E,<br>N331E<br>$\Delta 416-606$ | ~60            | Normal except Atp8p is expressed from allotropic <i>nATP8</i>                                           | This study         |
| <i>aep3</i>                                                        | Y305N                               | Not reported   | Not affected in wild type background. General decrease in a <i>fnt1</i> mutant                          | Lee et al., 2009   |
| $\Delta fnt1$                                                      | Deletion                            | ND             | Normal                                                                                                  | This study         |

|                                                      |                     |    |                                                                        |            |
|------------------------------------------------------|---------------------|----|------------------------------------------------------------------------|------------|
| <i>Δaep3 Δfmt1</i>                                   | Δ36–661<br>Deletion | ND | Severely depressed                                                     | This study |
| <i>Δaep3 Δfmt1 nATP8</i>                             | Δ36–661<br>Deletion | ND | Severely depressed                                                     | This study |
| <i>Δaep3 Δfmt1 sup<sup>+</sup> nATP8<sup>2</sup></i> | Δ36–661<br>Deletion | ND | Normal except<br>Atp8p is expressed<br>from allotropic<br><i>nATP8</i> | This study |

<sup>1</sup> The percentage of  $\rho^-$  and  $\rho^0$  mutants differs in different strains. The difference in the values reported for the *aep3* null and the point mutants could stem from the differences in the genetic background of iLL20 and W303, respectively.

<sup>2</sup>The suppressor in this strain has not been determined.

Table S2. Genotypes and Sources of *Saccharomyces cerevisiae* Strains

| Strain                                | Genotype                                                                                                                                                   | Source              |
|---------------------------------------|------------------------------------------------------------------------------------------------------------------------------------------------------------|---------------------|
| W303-1A                               | MATa <i>ade2-1 his3-1,15 leu2-3,112 trp1-1 ura3-1</i>                                                                                                      | a                   |
| W303-1B                               | MATα <i>ade2-1 his3-1,15 leu2-3,112 trp1-1 ura3-1</i>                                                                                                      | a                   |
| DFK/W303                              | MATα <i>kar1-1 ade2-101 leu2Δ ura3-52 lys2 Δarg8::URA3 with W303 mtDNA</i>                                                                                 | This study          |
| MR10                                  | MATa <i>ade2-1 his3-1,15 leu2-3,112 trp1-1 ura3-1 arg8::HIS3 atp6::ARG8<sup>m</sup></i>                                                                    | Rak et al., 2007    |
| MR6                                   | MATa <i>ade2-1 his3-1,15 leu2-3,112 trp1-1 ura3-1 arg8::HIS3</i>                                                                                           | Rak et al., 2007    |
| MR6ΔATP8                              | MATa <i>ade2-1 his3-1,15 leu2-3,112 trp1-1 ura3-1 arg8::HIS3 atp8::ARG8<sup>m</sup></i>                                                                    | Barros et al., 2011 |
| MR6ΔATP8/ST4                          | MATa <i>ade2-1 his3-1,15 leu2-3,112 trp1-1 ura3-1 arg8::HIS3 atp8::ARG8<sup>m</sup> + pATP8/ST4 (nATP8<sup>ADH1</sup>)</i>                                 | Barros et al., 2011 |
| a/αW303                               | MATa/α <i>ade2-1/ade2-1 his3-1,15/his3-1,15 leu2-3,112/leu2-3,112 trp1-1/trp1-1 ura3-1/ura3-1</i>                                                          | a                   |
| aW303 ΔAEP3                           | MATa <i>ade2-1 his3-1,15 leu2-3,112 trp1-1 ura3-1 aep3::HIS3</i>                                                                                           | Ellis et al., 2004  |
| aW303 ΔAEP3/S <sup>+</sup> /22        | MATa <i>ade2-1 his3-1,15 leu2-3,112 trp1-1 ura3-1 aep3::HIS3 nrd1 + pATP8-22</i>                                                                           | This study          |
| W303 ΔAEP3/S <sup>+</sup> /22         | MATα <i>ade2-1 his3-1,15 leu2-3,112 trp1-1 ura3-1 aep3::HIS3 pta1 + pATP8-22</i>                                                                           | This study          |
| a/αW303ΔAEP3/22                       | MATa/α <i>ade2-1/ade2-1 his3-1,15/his3-1,15 leu2-3,112/leu2-3,112 trp1-1/trp1-1 ura3-1/ura3-1 aep3::HIS3/aep3::HIS3 + pATP8-22 (nATP8)</i>                 | This study          |
| a/αW303ΔAEP3/ST4                      | MATa/α <i>ade2-1/ade2-1 his3-1,15/his3-1,15 leu2-3,112/leu2-3,112 trp1-1/trp1-1 ura3-1/ura3-1 aep3::HIS3/aep3::HIS3 + pATP8/ST4 (nATP8<sup>ADH1</sup>)</i> | This study          |
| W303ΔFMT1                             | MATα <i>ade2-1 his3-1,15 leu2-3,112 trp1-1 ura3-1 fmt1::ura3</i>                                                                                           | This study          |
| W303 ΔAEP3ΔFMT1                       | MATα <i>ade2-1 his3-1,15 leu2-3,112 trp1-1 ura3-1 fmt1::ura3 aep3::HIS3</i>                                                                                | This study          |
| aW303 ΔAEP3ΔFMT1/ S <sup>+</sup> / 22 | MATa <i>ade2-1 his3-1,15 leu2-3,112 trp1-1 ura3-1 fmt1::ura3 aep3::HIS3 + pATP8-22 sup<sup>+</sup></i>                                                     | This study          |

|                                                 |                                                                                                                           |                         |
|-------------------------------------------------|---------------------------------------------------------------------------------------------------------------------------|-------------------------|
| aW303 $\Delta$ AEP3 $\Delta$ FMT1/22            | MATa <i>ade2-1 his3-1,15 leu2-3,112 trp1-1 ura3-1 fmt1::ura3 aep3::HIS3</i><br>+ pATP8-22                                 | This study              |
| W303 $\Delta$ AEP3 $\Delta$ SMT1                | MAT $\alpha$ <i>ade2-1 his3-1,15 leu2-3,112 trp1-1 ura3-1 smt1::ura3 aep3::HIS3</i>                                       | This study              |
| aW303 $\Delta$ AEP3/ S <sup>+</sup> / SMT1/22   | MATa <i>ade2-1 his3-1,15 leu2-3,112 trp1-1 ura3-1 aep3::HIS3 LEU2::SMT1 sup<sup>+</sup></i><br>+ pATP8-22                 | This study              |
| W303 $\Delta$ AEP3 $\Delta$ SMT1/22             | MAT $\alpha$ <i>ade2-1 his3-1,15 leu2-3,112 trp1-1 ura3-1 smt1::ura3 aep3::HIS3</i><br>+ pATP8-22                         | This study              |
| aW303/1c                                        | MATa <i>ade2-1 his3-1,15 leu2-3,112 trp1-1 ura3-1 leu2::aep3-1c + nrd1</i>                                                | This study <sup>b</sup> |
| aW303/1c/S <sup>+</sup> /22                     | MATa <i>ade2-1 his3-1,15 leu2-3,112 trp1-1 ura3-1 aep3-1c nrd1</i> + pATP8-22                                             | This study              |
| aW303 $\Delta$ AEP3/1c/ S <sup>+</sup> /22      | MATa <i>ade2-1 his3-1,15 leu2-3,112 trp1-1 ura3-1 aep3::HIS3 leu2::aep3-1c sup<sup>+</sup></i><br>+ pATP8-22              | This study              |
| aW303 $\Delta$ AEP3/1c/ S <sup>+</sup> /SMT1/22 | MATa <i>ade2-1 his3-1,15 leu2-3,112 trp1-1 ura3-1 aep3::HIS3 leu2::aep3-1c LEU2::SMT1sup<sup>+</sup></i> + pATP8-22       | This study              |
| aW303 $\Delta$ AEP3/1s/S <sup>+</sup> /22       | MATa <i>ade2-1 his3-1,15 leu2-3,112 trp1-1 ura3-1 aep3::HIS3 leu2::aep3-1s sup<sup>+</sup></i><br>+ pATP8-22              | This study <sup>b</sup> |
| aW303/6b                                        | MATa <i>ade2-1 his3-1,15 leu2-3,112 trp1-1 ura3-1 trp1::aep3-6b nrd1</i>                                                  | This study <sup>c</sup> |
| aW303/6b/S <sup>+</sup> /22                     | MATa <i>ade2-1 his3-1,15 leu2-3,112 trp1-1 ura3-1 aep3-6b sup<sup>+</sup></i> + pATP8-22                                  | This study              |
| aW303 $\Delta$ AEP3/6b/ S <sup>+</sup> /22      | MATa <i>ade2-1 his3-1,15 leu2-3,112 trp1-1 ura3-1 aep3::HIS3 trp1::aep3-6b sup<sup>+</sup></i><br>+ pATP8-22              | This study              |
| aW303 $\Delta$ AEP3/6b/ S <sup>+</sup> /SMT/22  | MATa <i>ade2-1 his3-1,15 leu2-3,112 trp1-1 ura3-1 aep3::HIS3 trp1::aep3-6b LEU2::SMT11 sup<sup>+</sup></i> + ATP8-22      | This study              |
| aW303 $\Delta$ AEP3/ST4                         | MATa <i>ade2-1 his3-1,15 leu2-3,112 trp1-1 ura3-1 aep3::HIS3</i> + pATP8/ST4<br>(nATP8 <sup>ADH1</sup> )                  | This study              |
| aW303 $\Delta$ AEP3/ST5                         | MATa <i>ade2-1 his3-1,15 leu2-3,112 trp1-1 ura3-1 aep3::HIS3 pta1</i> + pATP8-ST5 <sup>d</sup><br>(nATP8 <sup>GPD</sup> ) | This study              |
| $\alpha$ W303 $\Delta$ AEP3/22T                 | MAT $\alpha$ <i>ade2-1 his3-1,15 leu2-3,112 trp1-1 ura3-1 aep3::HIS3</i> + pATP8-22T (nATP8 <sup>GPD-CYCI</sup> )         | This study              |

MR6 $\Delta$ ATP8  $\Delta$ AEP3/ST4

MATa *ade2-1 his3-1,15 leu2-3,112 trp1-1*  
*ura3-1 arg8::HIS3 aep3::HIS3 atp8::ARG8<sup>m</sup>*  
+ pATP8/ST4 (*nATP8<sup>ADH1</sup>*)

This study

---

<sup>a</sup> Dr. R. Rothstein, Department of Human Genetics, Columbia University, New York, NY

<sup>b</sup> The *aep3-1c* and *aep3-1s* alleles were cloned in YIp351 (a *LEU2* integrative plasmid).

<sup>c</sup> The *aep-6b* allele was cloned in YIp349 (a *TRP1* integrative plasmid).

<sup>d</sup> pATP8/ST5 consists of *nATP8* downstream of the *GPD* promoter in the high copy plasmid YEp352.

Barros and Tzagoloff, Fig. S1

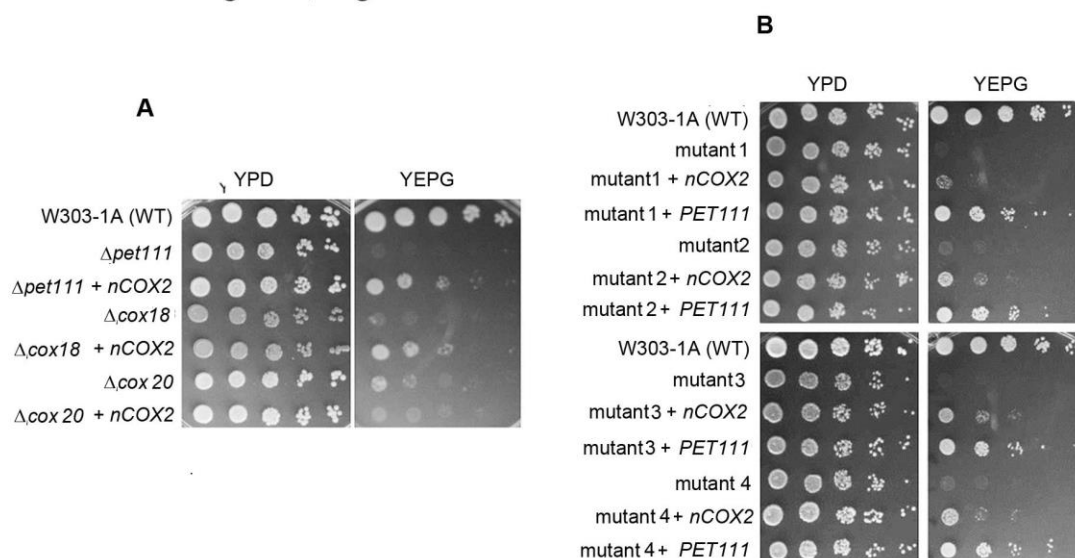

**Figure S1** Proof of principle for selection of mutants involved in mitochondrial gene expression. Respiratory growth of mutants involved in mitochondrial *COX2* expression is partially complemented by *nCOX2*, a recoded nuclear version of the mitochondrial gene. *nCOX2* contained the W56R in the first trans-membrane domain, which was shown to be needed for complementation of *cox2* mutations (Supekova et al, 2010). **A.** Mutants with null alleles in the *COX2* translational activator ( $\Delta pet111$ ) and chaperone of pre-Cox2p processing/translocation ( $\Delta cox18$  and  $\Delta cox20$ ) were transformed with allotypic *nCOX2*. Growth on YPD (rich glucose) and YEPG (rich ethanol/glycerol) was photographed after two day incubation at 30°C. **B.** Mutants 1, 2, 3 and 4 obtained by EMS mutagenesis were transformed with *nCOX2* and as a control with *PET111*. Growth was measured as in **A.**

**A**

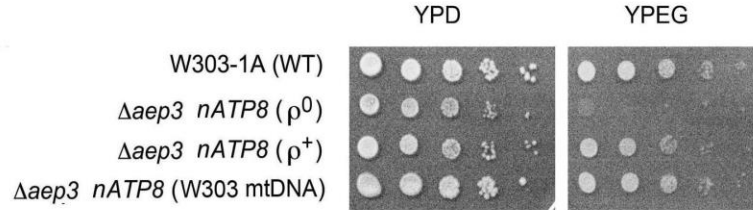

**B**

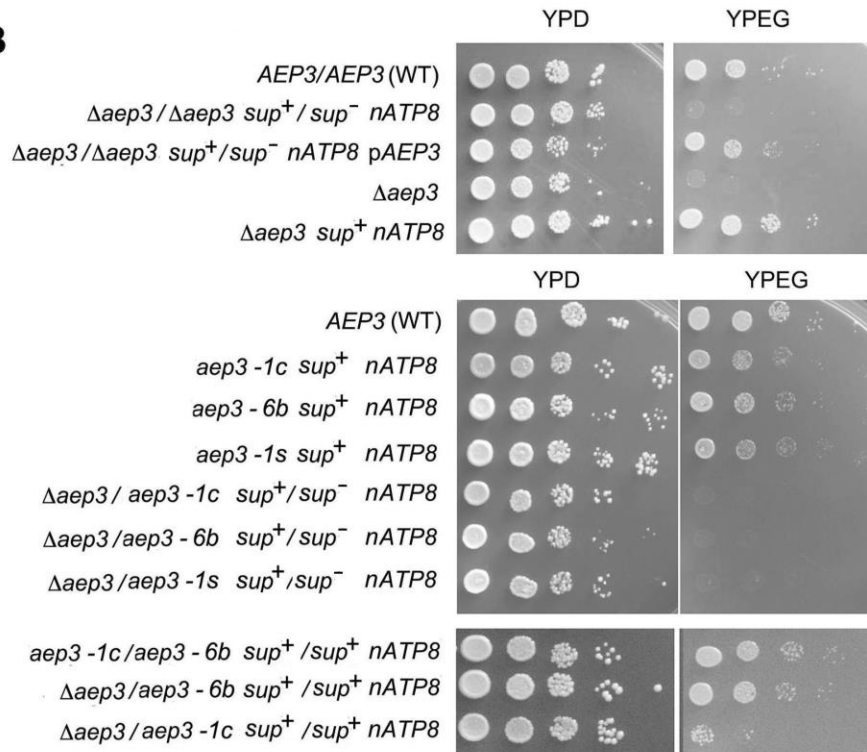

**Figure S2.** Genetic properties of *aep3* revertants. **A.** Test of the spontaneous suppressor for dominance and recessiveness. The wild type diploid and a diploid strain homozygous for the *aep3* null allele but heterozygous for the suppressor ( $\Delta aep3/\Delta aep3$  *sup*<sup>+</sup>/*sup*<sup>-</sup> *nATP8*) was obtained from a cross of the *aep3* null mutant W303 $\Delta$ AEP3 ( $\Delta aep3$  *sup*<sup>-</sup>) to the respiratory competent strain aW303 $\Delta$ AEP3/*nATP8*/*sup* ( $\Delta aep3$  *sup*<sup>+</sup> *nATP8*). The diploid strain obtained from this cross was also transformed with wild type *AEP3* ( $\Delta aep3/\Delta aep3$  *sup*<sup>+</sup>/*sup*<sup>-</sup> *nATP8* *pAEP3*). The respiratory deficient haploid strain aW303 $\Delta$ AEP3 ( $\Delta aep3$ ) and the respiratory competent revertant aW303 $\Delta$ AEP3/*nATP8*/*sup* ( $\Delta aep3$  *sup*<sup>+</sup> *nATP8*) used in the cross are also shown. The mutants and revertant were serially diluted and spotted on YPD and YPEG. The two plates were incubated at 30°C for 3 days. **B.** Upper panel: Same as **A** except the mutants



had the *aep3* 1c, 6b and 1s alleles. Lower panel: growth of diploid cells with the indicated genotypes on YPEG indicates they contain the same suppressor.

Barros and Tzagoloff, Fig. S3

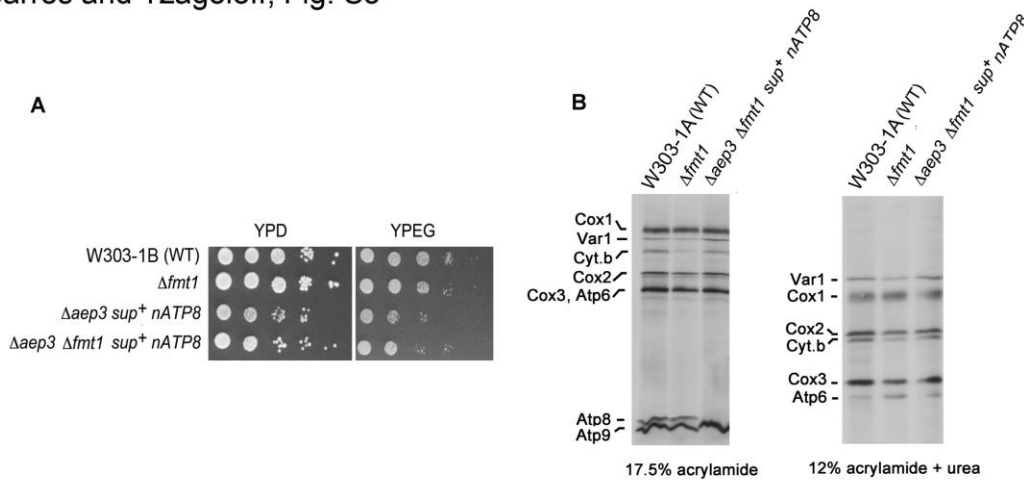

**Figure S3.** Growth and mitochondrial translation of *aep3-fmt1* double mutants. **A.** Serial dilutions of the wild type strain W303-1B, the *fmt1* null mutant ( $\Delta$ *fmt1*), the revertant of the *aep3* null mutant ( $\Delta$ *aep3* *sup*<sup>+</sup> *nATP8*) and the double mutant  $\Delta$ *aep3* ( $\Delta$ *fmt1* *sup*<sup>+</sup> *nATP8*). Serial dilutions of each strain were spotted on YPD and YPEG and photographed 3 days after incubation at 30°C **B)** The strains described in **A** were labeled with [<sup>35</sup>S] in the presence of cycloheximide as described in the Materials and Methods section and total mitochondrial protein separated on 17.5% and 12% polyacrylamide gel containing 5M urea. The urea gel resolves Cox2p and Atp6p. Proteins were transferred to nitrocellulose and the blot exposed to X-ray film. The mitochondrial translation products are identified in the left-hand margin of each gel.

## REFERENCES

Barros MH, Rak M, Paulela JA, Tzagoloff A (2011). Characterization of Gtf1p, the connector subunit of yeast mitochondrial tRNA-dependent amidotransferase. *J Biol Chem* 286, 32937-32947.

Ellis TP, Helfenbein KG, Tzagoloff A, Dieckmann CL (2004). Aep3p stabilizes the mitochondrial bicistronic mRNA encoding subunits 6 and 8 of the H<sup>+</sup>-translocating ATP synthase of *Saccharomyces cerevisiae*. J Biol Chem 279, 15728-15733.

Lee C, Tibbetts AS, Kramer G, Appling DR. (2009). Yeast *AEP3p* is an accessory factor in initiation of mitochondrial translation. J Biol Chem 284, 34116-34125.

Rak M, Tetaud E, Godard F, Sagot I, Salin B, Duvezin-Caubet S, Slonimski PP, Rytka J, di Rago JP (2007). Yeast cells lacking the mitochondrial gene encoding the ATP synthase subunit 6 exhibit a selective loss of complex IV and unusual mitochondrial morphology. J Biol Chem 282, 10853–10864.

Supekova L, Supek F, Greer JE, Schultz PG. (2010). A single mutation in the first transmembrane domain of yeast COX2 enables its allotopic expression. Proc Natl Acad Sci USA 107, 5047-5052.
